# Supplementary material for: A novel extracellular role for tissue transglutaminase in matrix-bound VEGF-mediated angiogenesis
Source: PubMed Central journal article supplement — Cell Death Dis. 2013 Sep 19;4(9):e808–. doi: 10.1038/cddis.2013.318 (PMC3789176; doi:10.1038/cddis.2013.318), 2013-09-19
Supplement: cddis2013318x2.pdf [file cddis2013318x2.pdf]

<sup>1</sup>Supplementary Table S1. Effect of TG2 inhibitors on tubule formation of HUVECs in the co-culture model of *in vitro* angiogenesis.

|                             | Area (x 10 <sup>3</sup> ) | No. of junctions              | No. of tubules          | Total tubule length (x10 <sup>3</sup> ) | Mean tubule length     |
|-----------------------------|---------------------------|-------------------------------|-------------------------|-----------------------------------------|------------------------|
| <b>Control</b>              | 162 ± 1.4                 | <b>118 ± 37</b>               | 286 ± 47                | 14 ± 3.8                                | 50 ± 7                 |
| <b>Vehicle (DMSO 0.01%)</b> | 146 ± 4.7                 | <b>116 ± 27</b>               | 262 ± 31                | 15 ± 1.2                                | 51 ± 4.2               |
| <b>R294 (50µM)</b>          | 111 ± 3.2 <sup>ab</sup>   | <b>79 ± 19</b>                | 164 ± 19 <sup>a</sup>   | 9 ± 1.4 <sup>ab</sup>                   | 60 ± 9                 |
| <b>R294 (100µM)</b>         | 52 ± 10 <sup>ab</sup>     | <b>22 ± 10<sup>ab</sup></b>   | 76 ± 19 <sup>ab</sup>   | 5.7 ± 1.1 <sup>ab</sup>                 | 49 ± 7.5               |
| <b>Z-DON (10µM)</b>         | 92 ± 2.6 <sup>ab</sup>    | <b>24 ± 8<sup>ab</sup></b>    | 148 ± 28 <sup>ab</sup>  | 13 ± 1.3                                | 54 ± 6                 |
| <b>Z-DON (50µM)</b>         | 68 ± 5.1 <sup>ab</sup>    | <b>30 ± 2.6<sup>ab</sup></b>  | 96 ± 14 <sup>ab</sup>   | 8 ± 0.8 <sup>ab</sup>                   | 37 ± 5                 |
| <b>R283 (50µM)</b>          | 102 ± 2.3 <sup>ab</sup>   | <b>86 ± 21</b>                | 171 ± 32 <sup>a</sup>   | 8 ± 1.9 <sup>ab</sup>                   | 48 ± 6.3               |
| <b>R283 (100µM)</b>         | 46 ± 18 <sup>ab</sup>     | <b>16 ± 11<sup>ab</sup></b>   | 63 ± 15 <sup>ab</sup>   | 3.8 ± 0.6 <sup>ab</sup>                 | 50 ± 5.3               |
| <b>Suramin</b>              | 22 ± 7.6 <sup>ab</sup>    | <b>7.5 ± 3.1<sup>ab</sup></b> | 48 ± 7.6 <sup>ab</sup>  | 1.2 ± 0.1 <sup>ab</sup>                 | 33 ± 1.4 <sup>ab</sup> |
| <b>Mouse IgG control</b>    | 158 ± 3.9                 | <b>115 ± 32</b>               | 291 ± 36                | 15 ± 3.3                                | 50 ± 5.8               |
| <b>TG100 antibody</b>       | 149 ± 3.1                 | <b>114 ± 21</b>               | 281 ± 20                | 15 ± 0.9                                | 49 ± 5.5               |
| <b>D11D12 antibody</b>      | 78 ± 12 <sup>ac</sup>     | <b>27 ± 3.4<sup>ac</sup></b>  | 92 ± 11 <sup>ac</sup>   | 7 ± 1.6 <sup>ac</sup>                   | 42 ± 4.1               |
| <b>Cub 7402 antibody</b>    | 151 ± 2.9                 | <b>115 ± 28</b>               | 276 ± 27                | 15 ± 1.1                                | 48 ± 7.3               |
| <b>VEGF (2ng/mL)</b>        | 254 ± 3.3 <sup>ab</sup>   | <b>415 ± 68<sup>ab</sup></b>  | 796 ± 115 <sup>ab</sup> | 26 ± 2.5 <sup>ab</sup>                  | 33 ± 4.2 <sup>ab</sup> |
| <b>VEGF + R294 (100µM)</b>  | 207 ± 7.2 <sup>abd</sup>  | <b>281 ± 32<sup>abd</sup></b> | 563 ± 43 <sup>abd</sup> | 20 ± 2.3 <sup>abd</sup>                 | 39 ± 8.3               |

<sup>1</sup>Calibration= 1 pixel

<sup>a</sup> Significantly different vs Untreated control group (p< 0.05); <sup>b</sup> Significantly different vs Vehicle (p<0.05); <sup>c</sup> Significantly different vs mouse IgG (p<0.05); <sup>d</sup> Significantly different vs VEGF (2ng/ml) (p<0.05).

**Supplementary Table S1. Effect of TG2 inhibitors on endothelial tubule formation.** Tubule formation as shown in **Figure 2a, 2d** and **6d** (effects of TG2 inhibitor on VEGF stimulation) was quantified using the TCS Cellworks AngioSys Image Analysis Software (ZHA-1800). Data represent Mean values ± S.D. from 3 separate experiments.

<sup>1</sup>Supplementary Table S2. Early and late effect of TG2 inhibitors on tubule formation of HUVECs in the co-culture model of *in vitro* angiogenesis.

|                             | DAY 6                     |                               |                         |                                         |                         | DAY 12                    |                        |                         |                                         |                         |
|-----------------------------|---------------------------|-------------------------------|-------------------------|-----------------------------------------|-------------------------|---------------------------|------------------------|-------------------------|-----------------------------------------|-------------------------|
|                             | Area (x 10 <sup>3</sup> ) | No. of junctions              | No. of tubules          | Total tubule length (x10 <sup>3</sup> ) | Mean tubule length      | Area (x 10 <sup>3</sup> ) | No. of junctions       | No. of tubules          | Total tubule length (x10 <sup>3</sup> ) | Mean tubule length      |
| <b>Control (DMSO 0.01%)</b> | 81 ± 3                    | <b>68 ± 2.3</b>               | 162 ± 9.5               | 8.2 ± 0.1                               | 51 ± 2.7                | 158 ± 1.7                 | 122 ± 32               | 277 ± 52                | 14 ± 3.8                                | 50 ± 7                  |
| <b>R294 (Treatment A)</b>   | 62 ± 4.4 <sup>c</sup>     | <b>40 ± 3.9<sup>c</sup></b>   | 110 ± 8 <sup>c</sup>    | 7.4 ± 0.3 <sup>c</sup>                  | 48 ± 2.4                | 143 ± 2.1 <sup>c</sup>    | 94 ± 24                | 203 ± 33 <sup>c</sup>   | 12 ± 2.5                                | 56 ± 5                  |
| <b>R294 (Treatment B)</b>   | 84 ± 3.2 <sup>a</sup>     | <b>71 ± 2.8<sup>a</sup></b>   | 157 ± 5.7 <sup>a</sup>  | 7.8 ± 0.1                               | 50 ± 1.2                | 127 ± 2.3 <sup>ac</sup>   | 79 ± 19                | 164 ± 19 <sup>c</sup>   | 11 ± 1.4                                | 60 ± 9                  |
| <b>R294 (Treatment C)</b>   | 58 ± 4 <sup>bc</sup>      | <b>34 ± 4.8<sup>bc</sup></b>  | 107 ± 12 <sup>bc</sup>  | 7.9 ± 0.2                               | 51 ± 1.2                | 46 ± 8.2 <sup>abc</sup>   | 16 ± 11 <sup>abc</sup> | 63 ± 15 <sup>abc</sup>  | 3.8 ± 0.6 <sup>abc</sup>                | 50 ± 5.3                |
| <b>Suramin</b>              | 29 ± 4.6 <sup>abc</sup>   | <b>25 ± 5.1<sup>abc</sup></b> | 87.5 ± 9 <sup>abc</sup> | 2.8 ± 0.5 <sup>abc</sup>                | 35 ± 1.5 <sup>abc</sup> | 22 ± 7.6 <sup>abc</sup>   | 7.5 ± 3 <sup>abc</sup> | 48 ± 7.6 <sup>abc</sup> | 1.2 ± 0.1 <sup>abc</sup>                | 33 ± 1.4 <sup>abc</sup> |

<sup>1</sup>Calibration= 1 pixel

<sup>a</sup> Significantly different vs Treatment A (p<0.05); <sup>b</sup> Significantly different vs Treatment B (p<0.05); <sup>c</sup> Significantly different vs Control (p< 0.05).

**Supplementary Table S2. Reversible effect of TG2 inhibitor R294 on tubule formation in the V2a co-culture assay.** Microtubule formation as shown in **Figure 3e** was quantified using the TCS Cellworks AngioSys Image Analysis Software (ZHA-1800). Treatment A, co-culture treated with R294 (50µM) days 1-6. Treatment B, late treated with R294 (50µM) days 6-12. Treatment C, treatment with R294 (50µM) from Days 1-12. Data represent Mean values ± S.D. from 3 separate experiments.

<sup>1</sup>Supplementary Table S3. TG2 knock down and add back on tubule formation of HUVECs in the co-culture model of *in vitro* angiogenesis.

|                            | Area (x10 <sup>3</sup> ) | No. of junctions          | No. of tubules            | Total tubule length (x10 <sup>3</sup> ) | Total tubule length (x10 <sup>3</sup> ) | Mean tubule length |
|----------------------------|--------------------------|---------------------------|---------------------------|-----------------------------------------|-----------------------------------------|--------------------|
| <b>Wild type</b>           | 97 ± 7                   | 91.5 ± 4.9                | 185 ± 25                  | 13 ± 2.8                                | 49.5 ± 4.9                              |                    |
| <b>Scramble vector</b>     | 109.5 ± 17.6             | 96.5 ± 9.1                | 178 ± 48                  | 11.95 ± 2.9                             | 49 ± 1.4                                |                    |
| <b>sh-TG2</b>              | 69.5 ± 3.5 <sup>ab</sup> | 28.5 ± 10.6 <sup>ab</sup> | 59.5 ± 3.5 <sup>ab</sup>  | 4.75 ± 0.6 <sup>ab</sup>                | 34.5 ± 3.5 <sup>ab</sup>                |                    |
| <b>sh-TG2 + TG2 vector</b> | 90.5 ± 3.5               | 77.5 ± 9.1                | 117.5 ± 6.3 <sup>ab</sup> | 9.2 ± 1.1                               | 45 ± 4.2 <sup>ab</sup>                  |                    |
| <b>Sh-TG2+ TG2 (W241A)</b> | 76.5 ± 3.5 <sup>ab</sup> | 32.5 ± 4.9 <sup>ab</sup>  | 63 ± 5.7 <sup>ab</sup>    | 3.85 ± 1.3 <sup>ab</sup>                | 29.7 ± 5.1 <sup>ab</sup>                |                    |

<sup>1</sup>Calibration= 1 pixel

<sup>a</sup>Significantly different vs Wild type (p<0.05); <sup>b</sup>Significantly different vs Scramble vector p<0.05).

**Supplementary Table S3. Effect of TG2 knockdown and add back on tubule formation in HUVEC co-culture model** as shown in **Figure 4d**. quantified using the TCS Cellworks AngioSys Image Analysis Software (ZHA-1800). Data represent Mean values ± S.D. from 2 separate experiments.

**Supplementary Table S4. List of antibodies used for IHC, IF, Western blotting and cell culture**

| <b>Antigen</b>                                     | <b>Species source</b> | <b>Company</b>                         | <b>Comments</b>           |
|----------------------------------------------------|-----------------------|----------------------------------------|---------------------------|
| TG2 (Clone Cub7402)                                | Mouse, monoclonal     | Lab Vision (Thermo Fisher, UK)         |                           |
| TG2 (Clone TG100)                                  | Mouse, monoclonal     | Lab Vision (Thermo Fisher, UK)         |                           |
| TG2                                                | Rabbit, polyclonal    | Lab Vision (Thermo Fisher, UK)         |                           |
| CD31                                               | Rabbit, polyclonal    | Abcam (Cambridge, UK)                  | Endothelial marker        |
| Vinculin                                           | Mouse, monoclonal     | Sigma-Aldrich (UK)                     | Focal adhesion            |
| VEGFR2, p-Tyr <sup>1214</sup>                      | Rabbit, polyclonal    | Santa Cruz (Germany)                   |                           |
| VEGFR                                              | Rabbit, polyclonal    | Santa Cruz (Germany)                   |                           |
| Akt, p-Ser <sup>473</sup>                          | Rabbit, polyclonal    | Cell Signalling (UK)                   |                           |
| Akt                                                | Rabbit, polyclonal    | Cell Signalling (UK)                   |                           |
| Phosphorylated ERK1/2                              | Rabbit, polyclonal    | Santa Cruz (Germany)                   |                           |
| ERK1/2                                             | Mouse, monoclonal     | Santa Cruz (Germany)                   |                           |
| FN                                                 | Rabbit, polyclonal    | Santa Cruz (Germany)                   |                           |
| VEGF                                               | Mouse, monoclonal     | BD (UK)                                |                           |
| von Willebrant factor                              | Mouse, monoclonal     | Dako (Glostrup, Denmark)               | A marker for angiogenesis |
| Rabbit IgG control                                 |                       | CovaLab (Lyon, France)                 | Control antibody          |
| Mouse IgG control                                  |                       | CovaLab (Lyon, France)                 | Control antibody          |
| FITC, TRITC or HRP-conjugated secondary antibodies |                       | Dako (Glostrup, Denmark) or Sigma (UK) |                           |
