# Supplementary material for: A novel extracellular role for tissue transglutaminase in matrix-bound VEGF-mediated angiogenesis
Source: PubMed Central journal article supplement — Cell Death Dis. 2013 Sep 19;4(9):e808–. doi: 10.1038/cddis.2013.318 (PMC3789176; doi:10.1038/cddis.2013.318), 2013-09-19
Supplement: cddis2013318x7.pdf [file cddis2013318x7.pdf]

Supplementary **Movies 1-4**. The effect of TG2 inhibition on HUVEC cell migration. The migration of HUVECs into the wound area, in the presence of TG2 inhibitor R283 or R294, were monitored using the ESSEN IncuCyte system as introduced in the Materials and Methods and in **Figure 3a**. DMSO was used as the vehicle control treatment for R294. The movies show the cell migration upto an 18 h incubation period.
